# Supplementary material for: Tunable luminescence and energy transfer of a Eu2+/Mn2+ co-doped Sr3NaY(PO4)3F phosphor for white LEDs
Source: Royal Society of Chemistry journal article supplement (doi:10.1039/c6ra20699a), 2016-01-01
Supplement: c6ra20699a1.pdf [file c6ra20699a1.pdf]

## Supporting information

### **Tunable luminescence and energy transfer of Eu<sup>2+</sup>/Mn<sup>2+</sup> co-doped Sr<sub>3</sub>NaY(PO<sub>4</sub>)<sub>3</sub>F phosphor for white LEDs**

Zaifa Yang, Denghui Xu\*, Jiangnan Du, Xuedong Gao and Jiayue Sun

School of Science, Beijing Technology and Business University, Beijing  
100048, China

\*Corresponding Author: E-mail: [xudenghui@sina.com](mailto:xudenghui@sina.com)

Telephone: +86-10-81353607

Fax: +86-10-81353377

**Table S1** Final refined structural parameters for SYNPF host derived from the Rietveld refinement of X-ray diffraction data at room temperature.

| Atom | X       | Y       | Z       | Wyckoff<br>position | Frac. | $U_{iso}$ | Mult. |
|------|---------|---------|---------|---------------------|-------|-----------|-------|
| Sr   | 0.25420 | 0.23775 | 0.25650 | 6g                  | 1     | 0.025     | 6     |
| Y    | 0.33333 | 0.66667 | 0.50482 | 2d                  | 1     | 0.025     | 2     |
| Na   | 0.33333 | 0.66667 | 0.01406 | 2d                  | 1     | 0.025     | 2     |
| P    | 0.03169 | 0.40485 | 0.23823 | 6g                  | 1     | 0.025     | 6     |
| O1   | 0.48100 | 0.14900 | 0.24700 | 6g                  | 1     | 0.025     | 6     |
| O2   | 0.05656 | 0.31730 | 0.41563 | 6g                  | 1     | 0.025     | 6     |
| O3   | 0.09124 | 0.37051 | 0.06687 | 6g                  | 1     | 0.025     | 6     |
| O4   | 0.12902 | 0.59070 | 0.26193 | 6g                  | 1     | 0.025     | 6     |
| F    | 0.00000 | 0.00000 | 0.19903 | 2c                  | 1     | 0.025     | 2     |

**Table S2** Composite element of SYNPF:Eu<sup>2+</sup>, Mn<sup>2+</sup> phosphor

| Standard         | Elements | Weight (%) | Atomic (%) |
|------------------|----------|------------|------------|
| SiO <sub>2</sub> | O K      | 24.53      | 55.64      |
| MgF <sub>2</sub> | F K      | 2.95       | 4.93       |
| Albite           | Na K     | 3.39       | 4.68       |
| GaP              | P K      | 14.37      | 14.71      |
| Mn               | Mn K     | 1.80       | 1.04       |
| SrF <sub>2</sub> | Sr L     | 37.58      | 13.62      |
| Y                | Y L      | 14.34      | 5.12       |
| EuF <sub>3</sub> | Eu L     | 1.04       | 0.26       |
| Total            |          | 100        | 100        |
